# Supplementary material
Source: publisher figshare collection journal article supplement (https://frontiersin.figshare.com/ndownloader/files/14788466)
Supplement: Supplementary file [file 14788466]

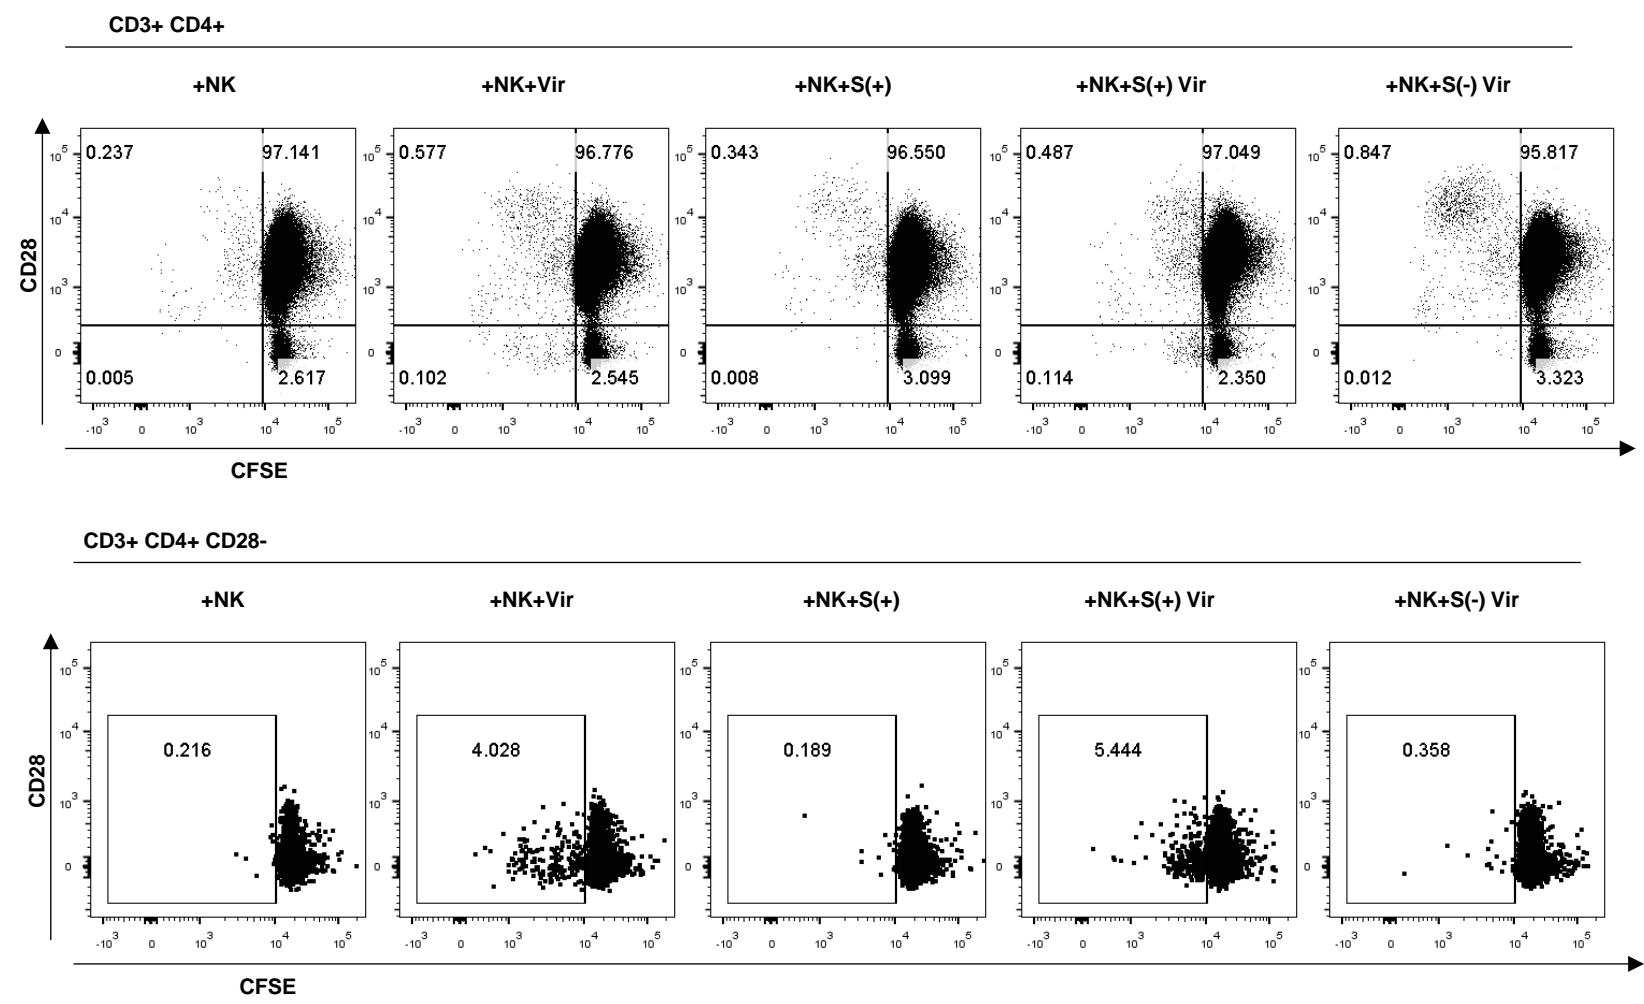

**Proliferation of CD4+ CD28- cells upon incubation with antigen loaded NK cells.** CFSE-stained CD4+ T cells were activated by NK cells loaded with HCMV in the presence or absence of HCMV+ or HCMV- donor serum and incubated 5 days with 500U/ml of IL2.
